# Supplementary material for: Pyrene-based, red-emitting, aggregation-induced emission luminogens: from structural construction to anti-counterfeiting applications
Source: Royal Society of Chemistry journal article supplement (doi:10.1039/d4qm00927d), 2024-11-25
Supplement: d4qm00927d1.pdf [file d4qm00927d1.pdf]

## Supporting Information

### **Pyrene-based red-emitting aggregation-induced emission luminogens: from high-efficiency structural construction to anti-counterfeiting applications**

Hua-Long Li,<sup>‡</sup> Zeng-Min Xue,<sup>‡</sup> Guang Yang, Fei Meng, Hong-Tao Lin, Wen-Xuan Zhao,<sup>\*</sup> Shu-Hai Chen,<sup>\*</sup> Chuan-Zeng Wang<sup>\*</sup>

## Contents

|                                                                                                                                                                                                       |     |
|-------------------------------------------------------------------------------------------------------------------------------------------------------------------------------------------------------|-----|
| <b>Figure S1.</b> <sup>1</sup> H NMR spectrum of <b>DCI-Py-1</b> (400 MHz, 293 K, CDCl <sub>3</sub> ).....                                                                                            | S3  |
| <b>Figure S2.</b> <sup>13</sup> C NMR spectrum of <b>DCI-Py-1</b> (101 MHz, 293 K, CDCl <sub>3</sub> ).....                                                                                           | S3  |
| <b>Figure S3.</b> <sup>1</sup> H NMR spectrum of <b>DCI-Py-2</b> (400 MHz, 293 K, CDCl <sub>3</sub> ) .....                                                                                           | S4  |
| <b>Figure S4.</b> <sup>13</sup> C NMR spectrum of <b>DCI-Py-2</b> (101 MHz, 293 K, CDCl <sub>3</sub> ) .....                                                                                          | S4  |
| <b>Figure S5.</b> MALDI-FTICR-MS of spectra of <b>DCI-Py-1</b> .....                                                                                                                                  | S5  |
| <b>Figure S6.</b> MALDI-FTICR-MS of spectra of <b>DCI-Py-2</b> .....                                                                                                                                  | S6  |
| <b>Table S1.</b> Crystal data and structure refinement of <b>DCI-Py-1</b> and <b>DCI-Py-2</b> .....                                                                                                   | S7  |
| <b>Table S2.</b> The energy level diagrams of of <b>DCI-Py-1</b> and <b>DCI-Py-2</b> .....                                                                                                            | S8  |
| <b>Figure S7.</b> Solvatochromism effect of absorption spectra for <b>DCI-Py-1</b> in <i>n</i> -Hexane, DCM, 1,4-Dioxane, THF, and DMF, respectively.....                                             | S9  |
| <b>Figure S8.</b> Solvatochromism effect of absorption spectra for <b>DCI-Py-2</b> in <i>n</i> -Hexane, DCM, 1,4-Dioxane, THF, and DMF, respectively.....                                             | S9  |
| <b>Figure S9.</b> (A) Solvatochromism effect of emission spectra for <b>DCI-Py-1</b> in <i>n</i> -Hexane, DCM, 1,4-Dioxane, THF, and DMF, respectively. (B) CIE 1931 chromaticity diagram.....        | S10 |
| <b>Figure S10.</b> (A) Solvatochromism effect of emission spectra for <b>DCI-Py-2</b> in <i>n</i> -Hexane, DCM, 1,4-Dioxane, THF, and DMF, respectively. (B) CIE 1931 chromaticity diagram.....       | S10 |
| <b>Figure S11.</b> PL spectra of <b>DCI-Py-2</b> in THF/water mixtures with different water fractions ( <i>f<sub>w</sub></i> ) .....                                                                  | S11 |
| <b>Figure S12.</b> Plots of relative emission intensity ( <i>I/I<sub>0</sub></i> , <i>I<sub>0</sub></i> is the PL intensity of <i>f<sub>w</sub></i> =99%) and $\lambda_{em}$ of <b>DCI-Py-2</b> ..... | S11 |
| <b>Figure S13.</b> The CIE 1931 chromaticity diagram for luminogens <b>DCI-Py-1</b> .....                                                                                                             | S12 |
| <b>Figure S14.</b> Fluorescence decay profiles of <b>DCI-Py-1</b> and <b>DCI-Py-2</b> .....                                                                                                           | S12 |
| <b>Figure S15.</b> The dihedral angles between the pyrene core and <b>DCI</b> group in <b>DCI-Py-1</b> .....                                                                                          | S13 |
| <b>Figure S16.</b> The dihedral angles between the pyrene core and <b>DCI</b> group in <b>DCI-Py-</b>                                                                                                 |     |



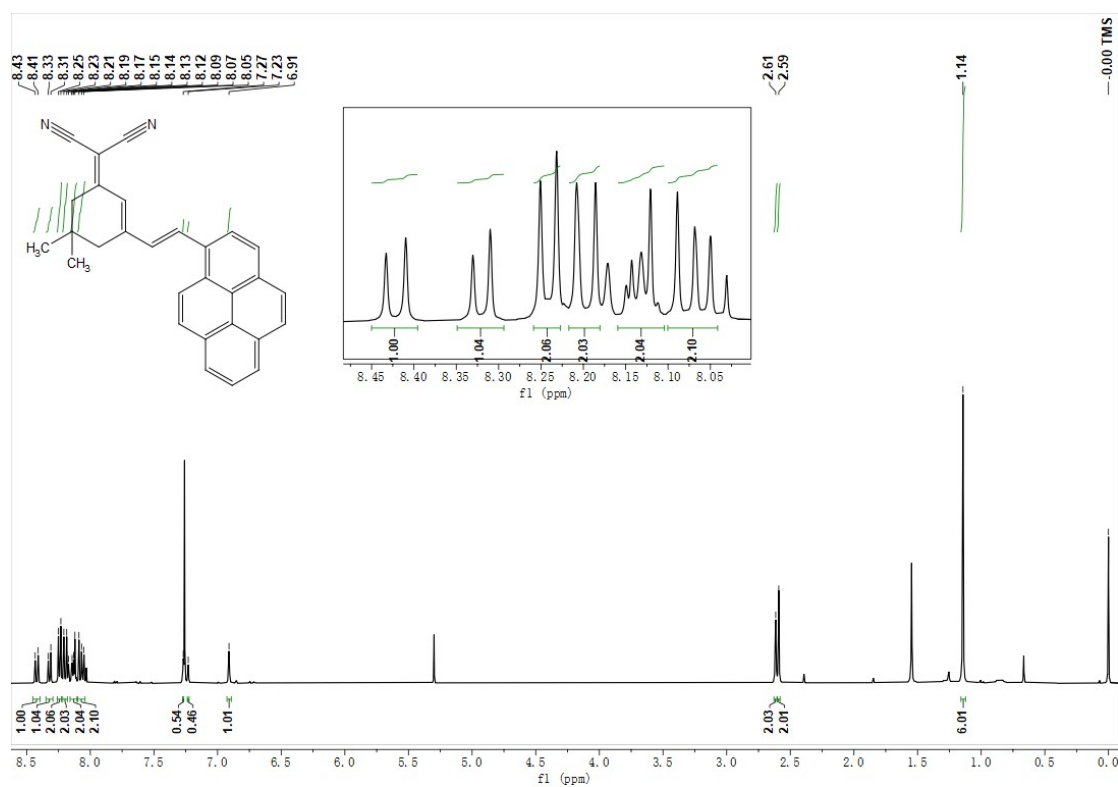

**Figure S1.**  $^1\text{H}$  NMR spectrum of DCI-Py-1 (400 MHz, 293 K,  $\text{CDCl}_3$ )

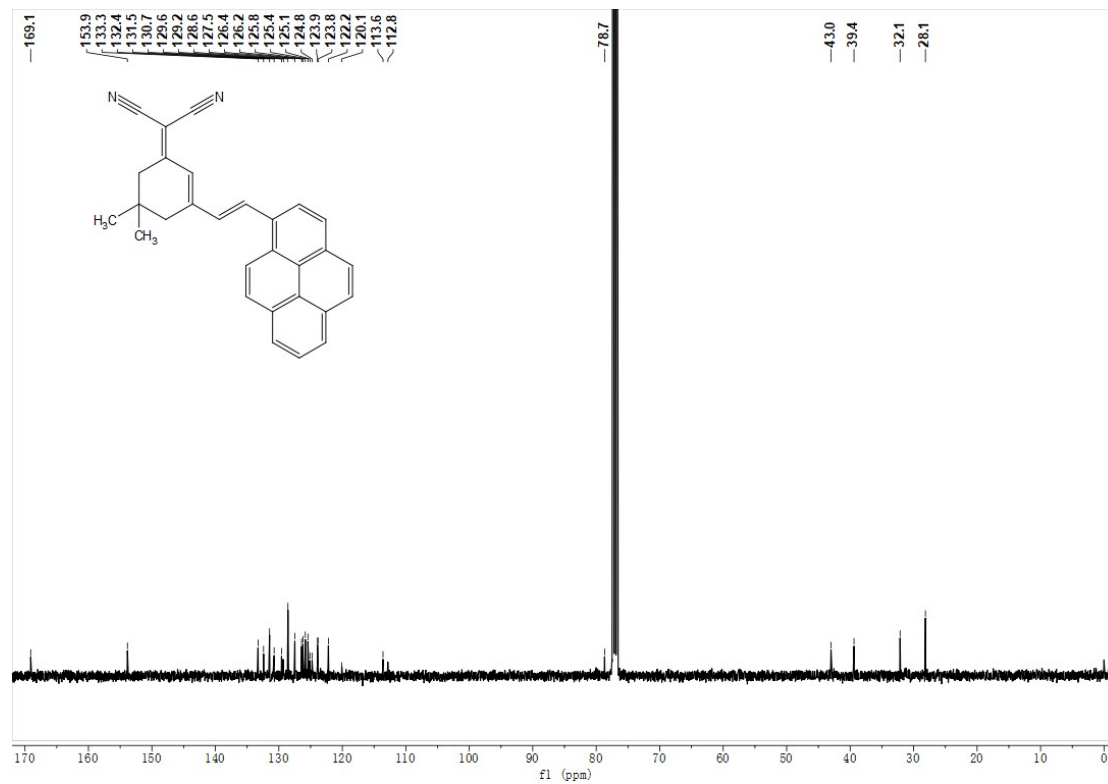

**Figure S2.**  $^{13}\text{C}$  NMR spectrum of DCI-Py-1 (101 MHz, 293 K,  $\text{CDCl}_3$ )

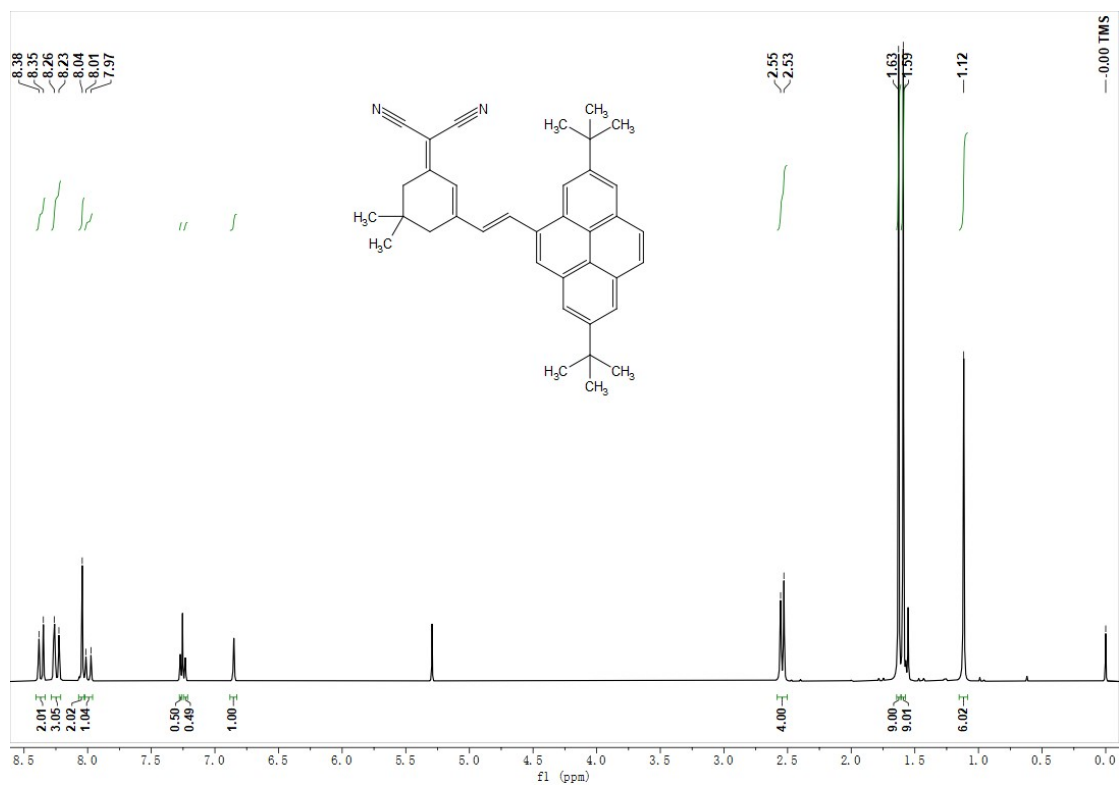

**Figure S3.**  $^1\text{H}$  NMR spectrum of DCI-Py-2 (400 MHz, 293 K,  $\text{CDCl}_3$ )

**Figure S4.**  $^{13}\text{C}$  NMR spectrum of DCI-Py-2 (101 MHz, 293 K,  $\text{CDCl}_3$ )

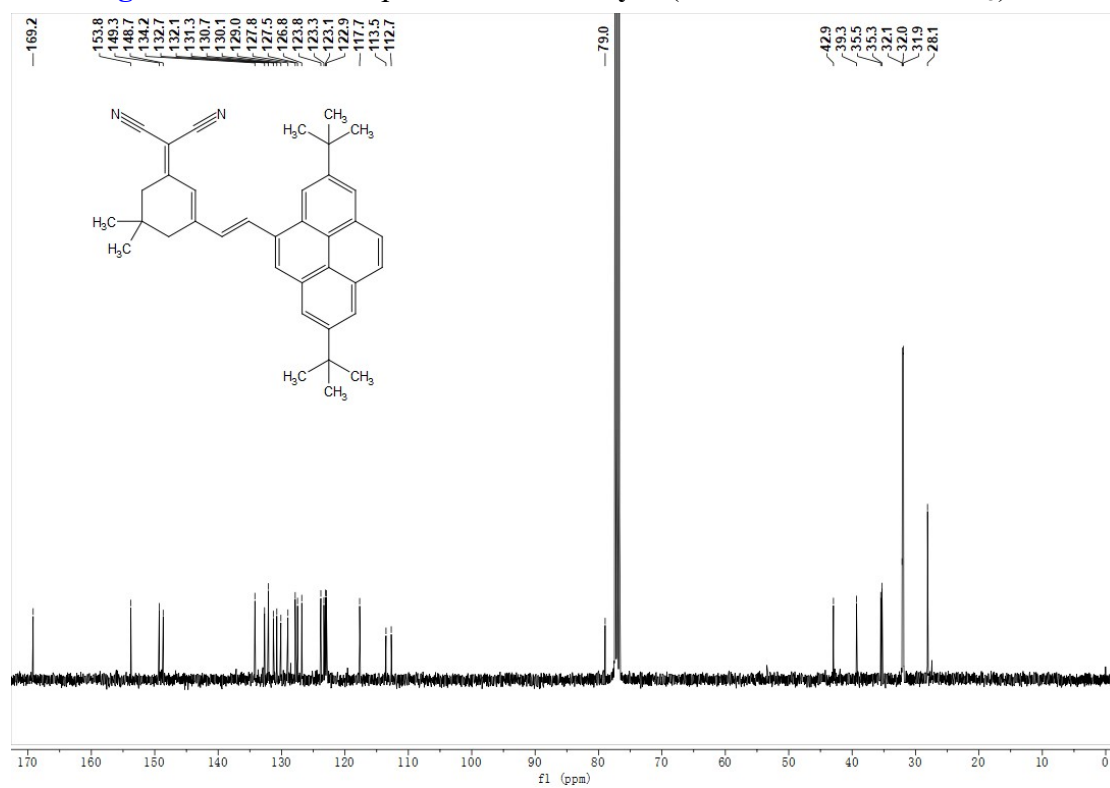

**Acquisition Parameter**

|                       |           |                      |           |                       |                          |
|-----------------------|-----------|----------------------|-----------|-----------------------|--------------------------|
| Acquisition Mode      | Single MS | Acquired Scans       | 2         | Calibration Date      | Mon Mar 11 04:33:04      |
| Polarity              | Positive  | No. of Cell Fills    | 1         | Data Acquisition Size | 209#152                  |
| Broadband Low Mass    | 202.1 m/z | No. of Laser Shots   | 10        | Data Processing Size  | 4194304                  |
| Broadband High Mass   | 600.0 m/z | Laser Power          | 34.8 lp   | Apodization           | Sine-Bell Multiplication |
| Source Accumulation   | 0.001 sec | Laser Shot Frequency | 0.020 sec |                       |                          |
| Ion Accumulation Time | 0.010 sec |                      |           |                       |                          |

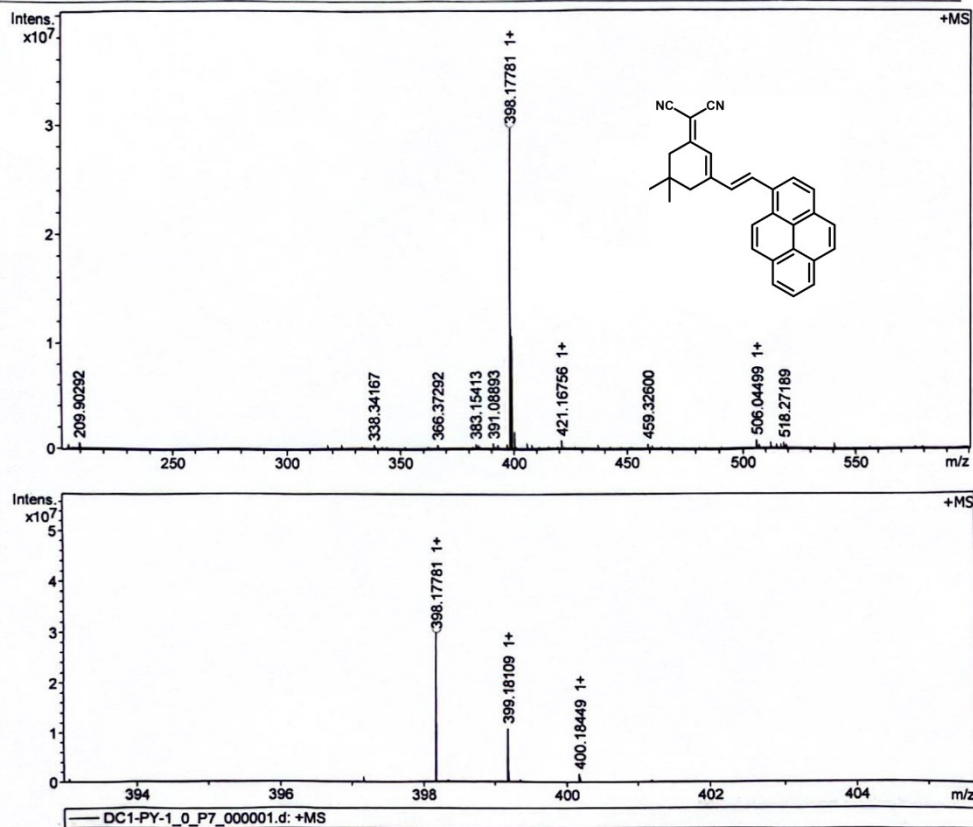

| Meas. m/z  | # | Ion Formula                                    | Score  | m/z        | err [ppm] | Mean err [ppm] | mSigma | rdb  | e <sup>-</sup> Conf | N-Rule |
|------------|---|------------------------------------------------|--------|------------|-----------|----------------|--------|------|---------------------|--------|
| 398.177807 | 1 | C <sub>29</sub> H <sub>22</sub> N <sub>2</sub> | 100.00 | 398.177750 | -0.1      | -0.2           | 14.8   | 20.0 | odd                 | ok     |

**Figure S5.** MALDI-FTICR-MS of spectra of DCI-Py-1

| Acquisition Parameter |            |                      |           |                       |                          |
|-----------------------|------------|----------------------|-----------|-----------------------|--------------------------|
| Acquisition Mode      | Single MS  | Acquired Scans       | 2         | Calibration Date      | Mon Mar 11 04:33:04      |
| Polarity              | Positive   | No. of Cell Fills    | 1         | Data Acquisition Size | 208#152                  |
| Broadband Low Mass    | 202.1 m/z  | No. of Laser Shots   | 10        | Data Processing Size  | 4194304                  |
| Broadband High Mass   | 1000.0 m/z | Laser Power          | 25.6 lp   | Apodization           | Sine-Bell Multiplication |
| Source Accumulation   | 0.001 sec  | Laser Shot Frequency | 0.020 sec |                       |                          |
| Ion Accumulation Time | 0.010 sec  |                      |           |                       |                          |

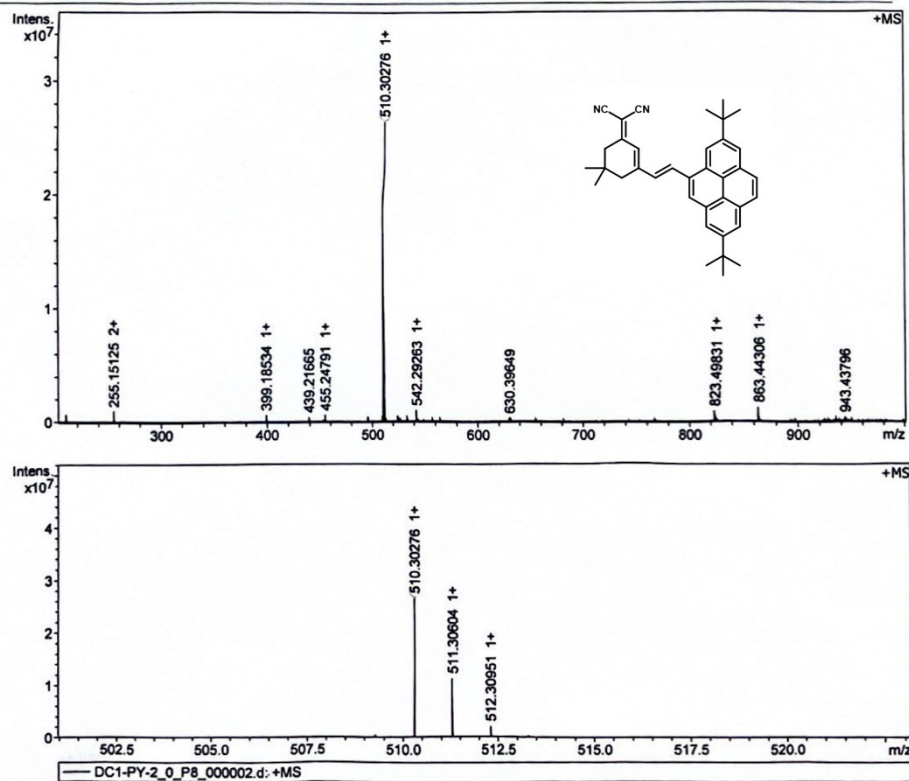

| Meas. m/z  | # | Ion Formula | Score  | m/z        | err [ppm] | Mean err [ppm] | mSigma | rdb  | e <sup>-</sup> Conf | N-Rule |
|------------|---|-------------|--------|------------|-----------|----------------|--------|------|---------------------|--------|
| 510.302759 | 1 | C37H38N2    | 100.00 | 510.302951 | -0.4      | 0.3            | 2.8    | 20.0 | odd                 | ok     |

Figure S6. MALDI-FTICR-MS of spectra of DCI-Py-2

**Table S1.** Crystal data and structure refinement of **DCI-Py-1** and **DCI-Py-2**.<sup>[a, b]</sup>

| Compounds                                            | <b>DCI-Py-1</b>                                                | <b>DCI-Py-2</b>                                |
|------------------------------------------------------|----------------------------------------------------------------|------------------------------------------------|
| Empirical formula                                    | C <sub>30</sub> H <sub>24</sub> Cl <sub>2</sub> N <sub>2</sub> | C <sub>37</sub> H <sub>38</sub> N <sub>2</sub> |
| Formula weight                                       | 483.41                                                         | 510.69                                         |
| Crystal system                                       | triclinic                                                      | orthorhombic                                   |
| Space group                                          | <i>P-1</i>                                                     | <i>P n a 21</i>                                |
| <i>a</i> [Å]                                         | 9.2959(6)                                                      | 13.2805(13)                                    |
| <i>b</i> [Å]                                         | 9.4991(5)                                                      | 35.882(9)                                      |
| <i>c</i> [Å]                                         | 15.3763(9)                                                     | 6.2204(9)                                      |
| $\alpha$ [°]                                         | 97.995(5)                                                      | 90                                             |
| $\beta$ [°]                                          | 95.595(5)                                                      | 90                                             |
| $\gamma$ [°]                                         | 112.544(6)                                                     | 90                                             |
| Volume[Å <sup>3</sup> ]                              | 1224.82(14)                                                    | 2964.2(9)                                      |
| <i>Z</i>                                             | 2                                                              | 4                                              |
| $\mu$                                                | 2.537 mm <sup>-1</sup>                                         | 0.499                                          |
| <i>F</i> (000)                                       | 504                                                            | 1096                                           |
| Crystal size[mm <sup>3</sup> ]                       | 0.32 × 0.08 × 0.01                                             | 0.38 × 0.02 × 0.01                             |
| Dcalcd[Mg/m <sup>3</sup> ]                           | 1.311                                                          | 1.144                                          |
| Temperature [K]                                      | 170(10)                                                        | 170(10)                                        |
| Measured reflns                                      | 4943                                                           | 5537                                           |
| Unique reflns                                        | 4214                                                           | 4376                                           |
| Parameters                                           | 310                                                            | 392                                            |
| <i>R</i> (int)                                       | 0.1363                                                         | 0.1197                                         |
| <i>R</i> [ <i>I</i> > 2σ( <i>I</i> )] <sup>[a]</sup> | 0.1289                                                         | 0.0983                                         |
| <i>wR</i> 2[all data] <sup>[b]</sup>                 | 0.3405                                                         | 0.2330                                         |

<sup>[a]</sup> $R_1 = \sum ||F_o| - |F_c||$  (based on reflections with  $F_o^2 > 2\sigma F^2$ ) <sup>[b]</sup> $wR_2 = [\sum [w(F_o^2 - F_c^2)^2] / \sum [w(F_o^2)^2]]^{1/2}$ ;  $w = 1/[\sigma^2(F_o^2) + (0.095P)^2]$ ;  $P = [\max(F_o^2, 0) + 2F_c^2]/3$  (also with  $F_o^2 > 2\sigma F^2$ )



**Table S2.** The energy level diagrams of **DCI-Py-1** and **DCI-Py-2**.

| Compounds | DFT (eV) |       |              |
|-----------|----------|-------|--------------|
|           | HOMO     | LUMO  | $\Delta E_g$ |
| DCI-Py-1  | -5.51    | -2.92 | 2.59         |
| DCI-Py-2  | -5.49    | -2.84 | 2.65         |

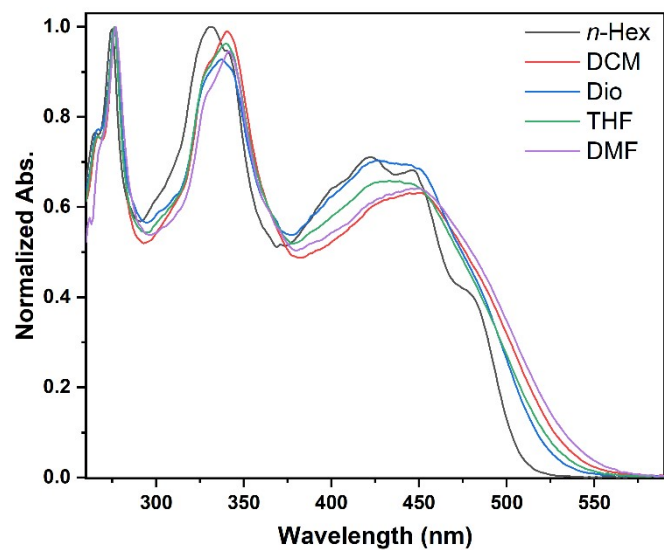

**Figure S7.** Solvatochromism effect of absorption spectra for **DCI-Py-1** in *n*-Hexane, DCM, 1,4-Dioxane, THF, and DMF, respectively.

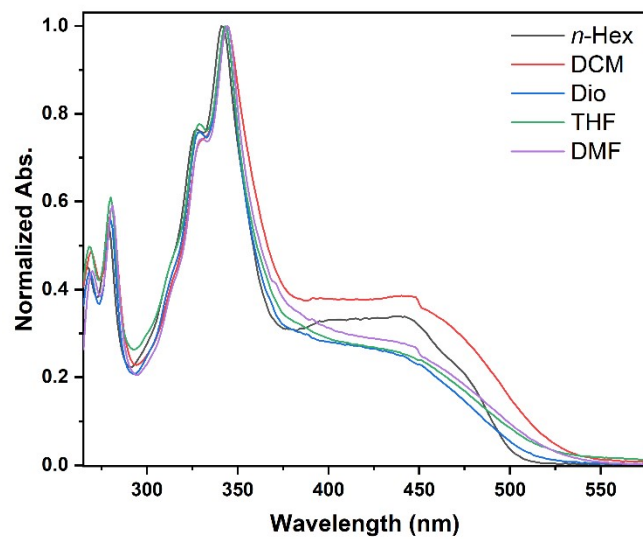

**Figure S8.** Solvatochromism effect of absorption spectra for **DCI-Py-2** in *n*-Hexane, DCM, 1,4-Dioxane, THF, and DMF, respectively.

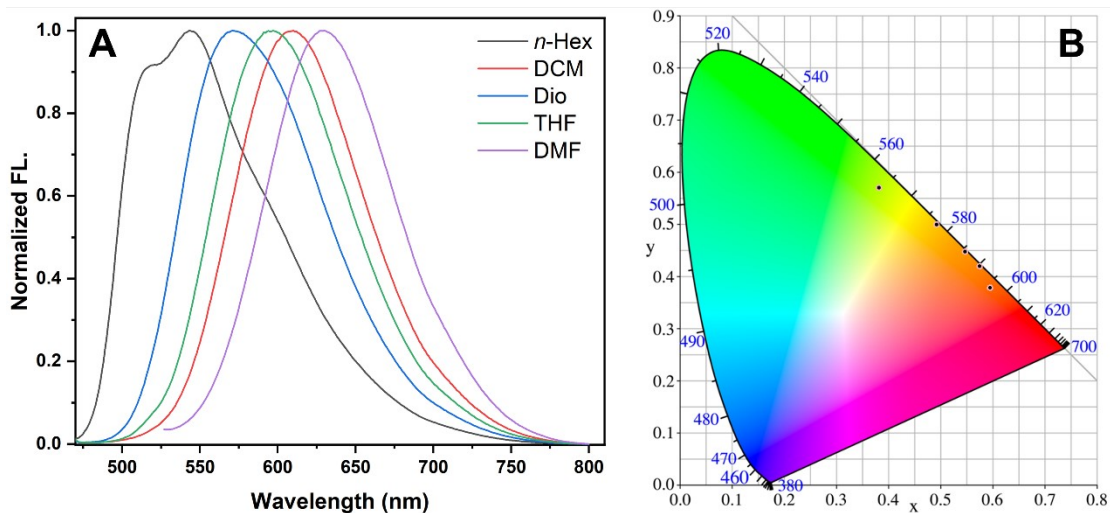

**Figure S9.** (A) Solvatochromism effect of emission spectra for **DCI-Py-1** in *n*-Hexane, DCM, 1,4-Dioxane, THF, and DMF, respectively. (B) CIE 1931 chromaticity diagram

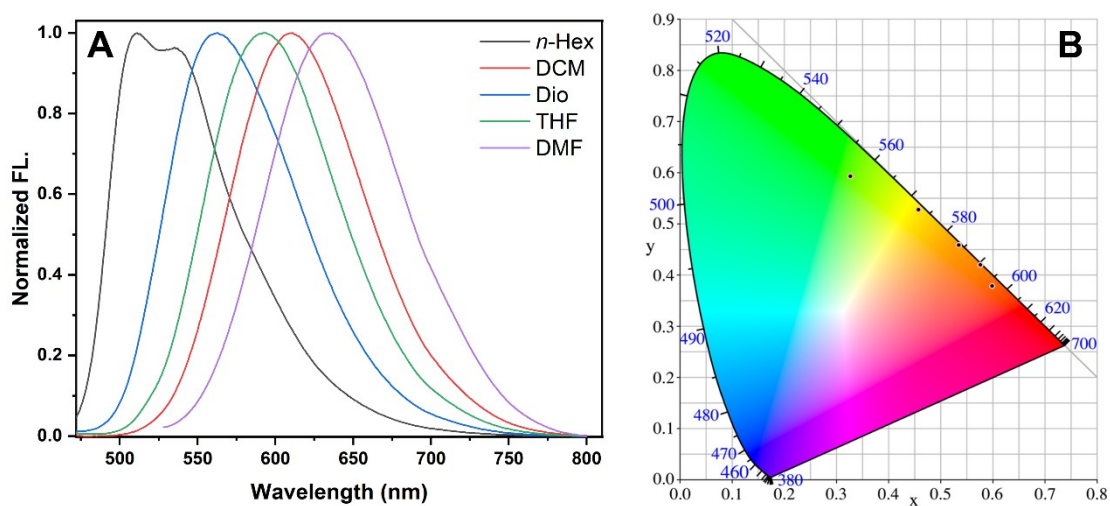

**Figure S10.** (A) Solvatochromism effect of emission spectra for **DCI-Py-2** in *n*-Hexane, DCM, 1,4-Dioxane, THF, and DMF, respectively. (B) CIE 1931 chromaticity diagram.

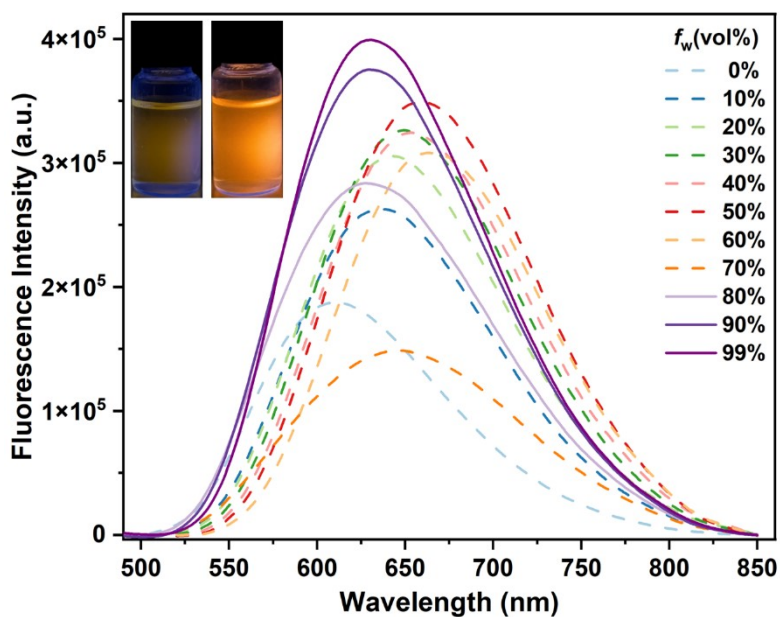

**Figure S11.** PL spectra of DCI-Py-2 in THF/water mixtures with different water fractions ( $f_w$ ).

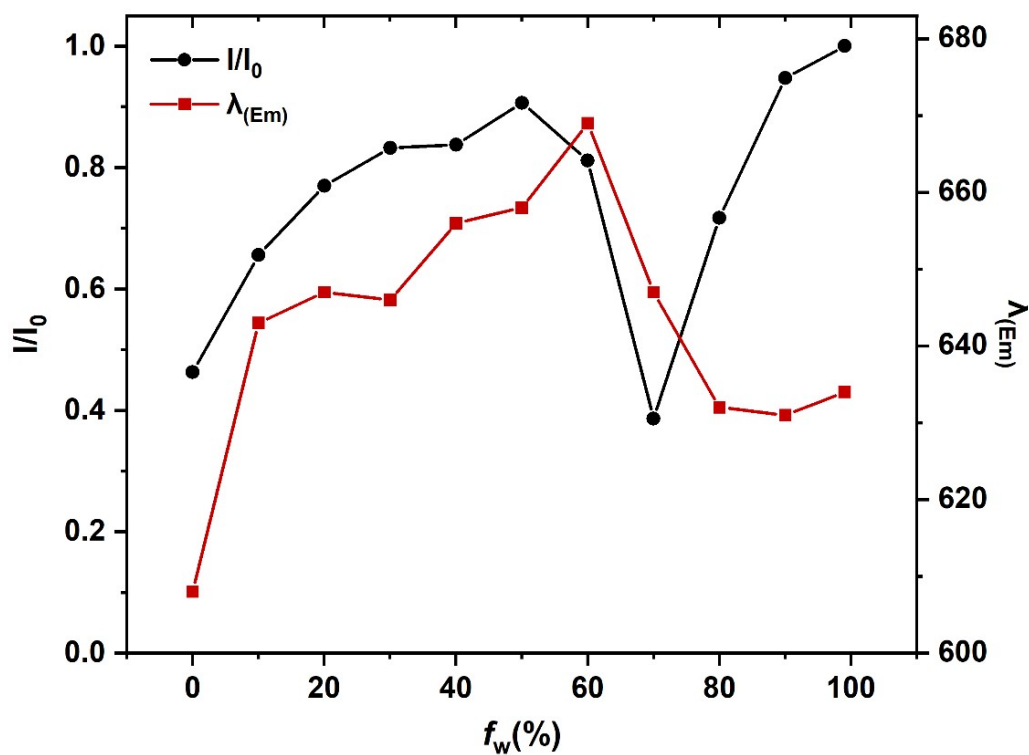

**Figure S12.** Plots of relative emission intensity ( $I/I_0$ ,  $I_0$  is the PL intensity of  $f_w=99\%$ ) and  $\lambda_{em}$  of DCI-Py-2.

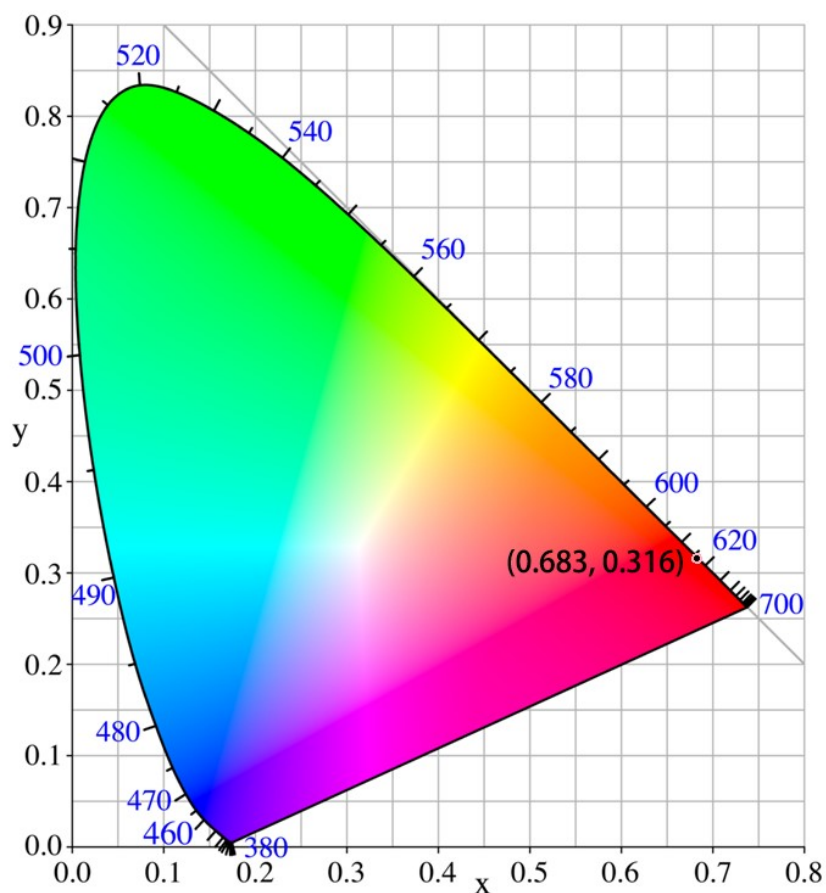

**Figure S13.** The CIE 1931 chromaticity diagram for luminogens **DCI-Py-1**.

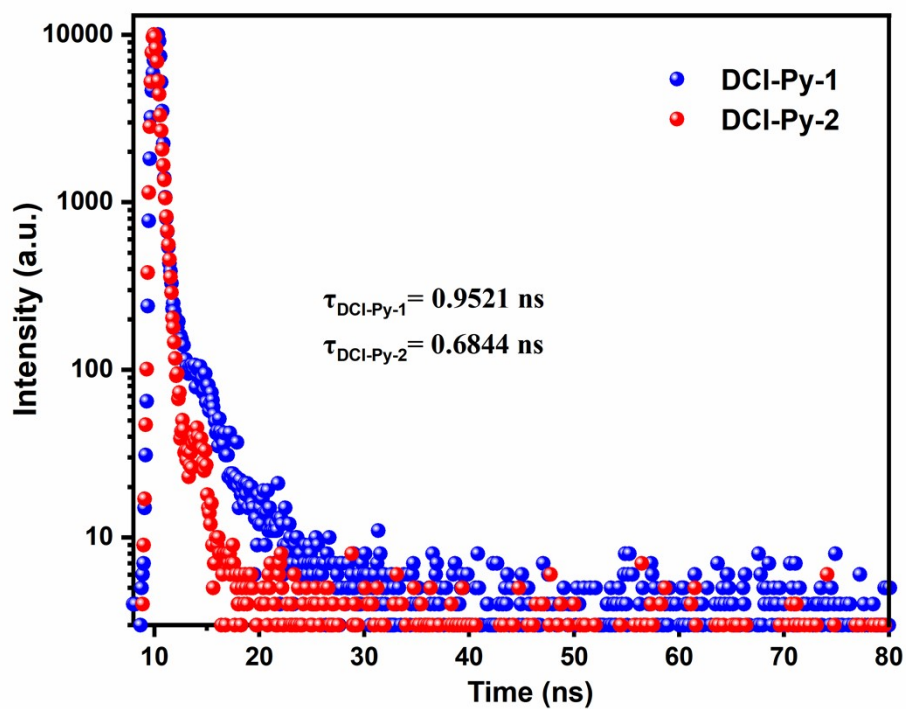

**Figure S14.** Fluorescence decay profiles of **DCI-Py-1** and **DCI-Py-2**.

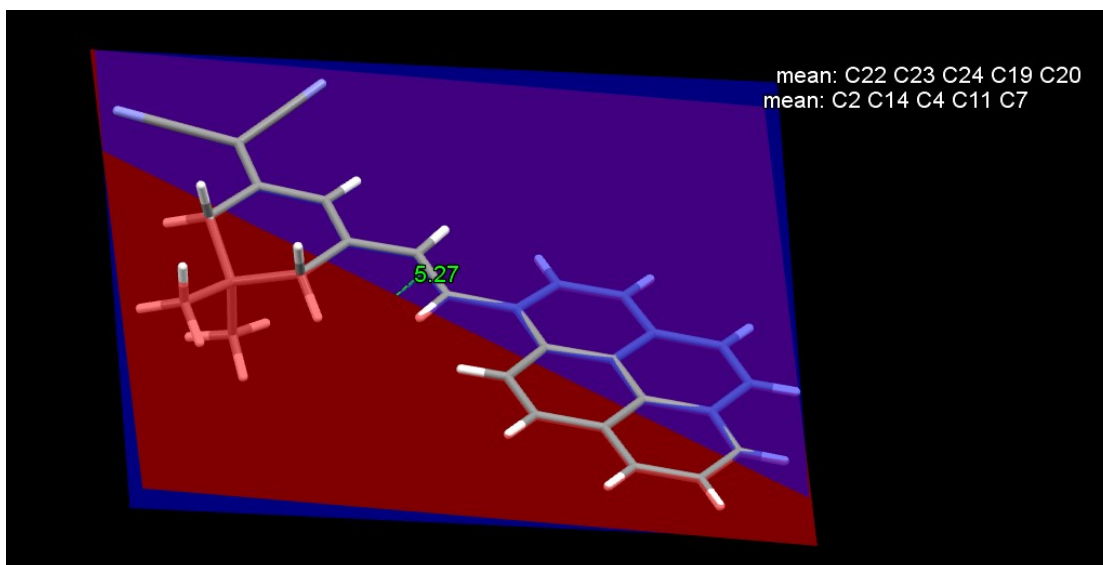

**Figure S15.** The dihedral angles between the pyrene core and DCI group in DCI-Py-1.

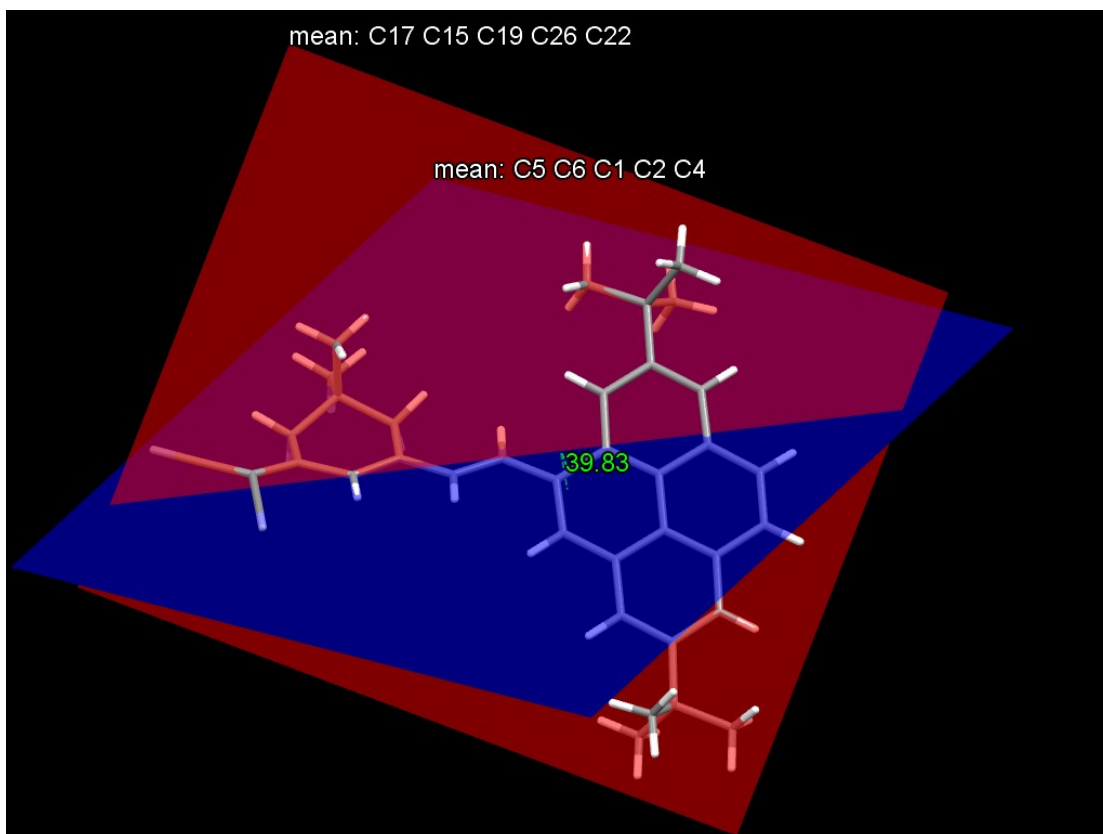

**Figure S16.** The dihedral angles between the pyrene core and DCI group in DCI-Py-2.
